# Supplementary material for: Heterogeneous Fenton-Like Catalysis of Electrogenerated H2O2 for Dissolved RDX Removal
Source: Frontiers journal article supplement (doi:10.3389/fceng.2022.864816), 2022-05-03
Supplement: Data_Sheet_1.PDF [file Data_Sheet_1.PDF]

## Appendix

### Heterogeneous Fenton-like Catalysis of Electrogenerated H<sub>2</sub>O<sub>2</sub> for Dissolved RDX Removal

Patrick Compton<sup>1\*</sup>, Nazli Rafei Dehkordi<sup>1</sup>, Michael Knapp<sup>1</sup>, Loretta A. Fernandez<sup>1</sup>, Akram N. Alshawabkeh<sup>1</sup>, and Philip Larese-Casanova<sup>1</sup>

<sup>1</sup>Department of Civil and Environmental Engineering, Northeastern University, Boston, MA, USA

\*Corresponding Author

Patrick Compton

Department of Civil & Environmental Engineering

Northeastern University

360 Huntington Ave, 501 ST, Boston, Massachusetts, 02115, USA

Phone: +1-617-373-4153

Compton.p@northeastern.edu

Keywords: Explosives<sub>1</sub>, oxidation processes<sub>2</sub>, heterogenous catalysts<sub>3</sub>, electroperoxidation<sub>4</sub>, RDX<sub>5</sub>

This Appendix contains four figures on materials used as cathodes, cathode orientation within the electroperoxidation column, and the pH regime within this column.

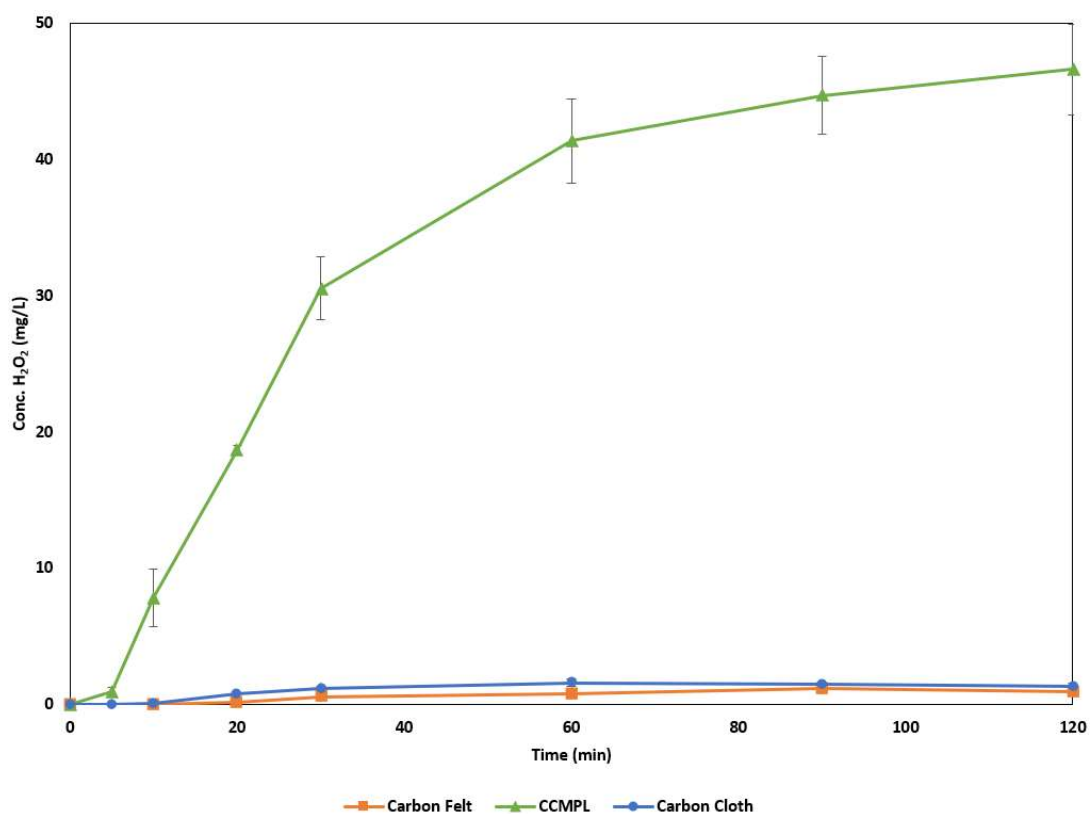

**Figure S1.** Comparison of hydrophobic/hydrophilic commercially available cathode materials in electrogenerating  $\text{H}_2\text{O}_2$  in flow-through reactor at  $9.5 \text{ mA/cm}^2$  current density

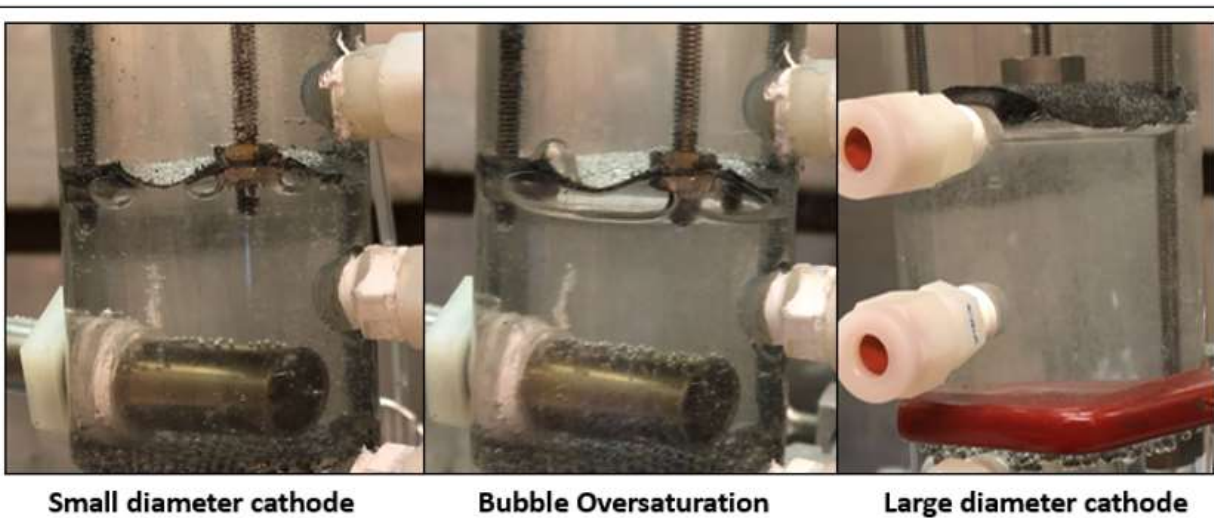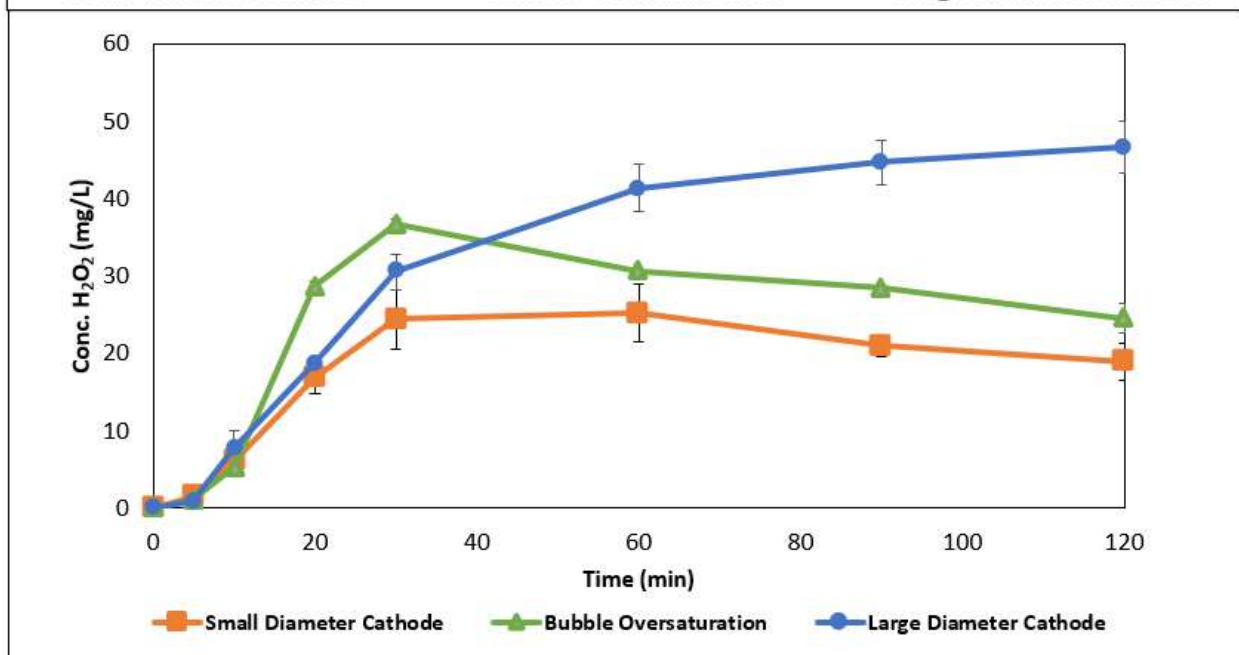

**Figure S2.** CCMPL cathode size comparison and  $\text{H}_2\text{O}_2$  generation due to constant  $\text{O}_2$  bypass, oversaturation, and designed  $\text{O}_2$  bypass

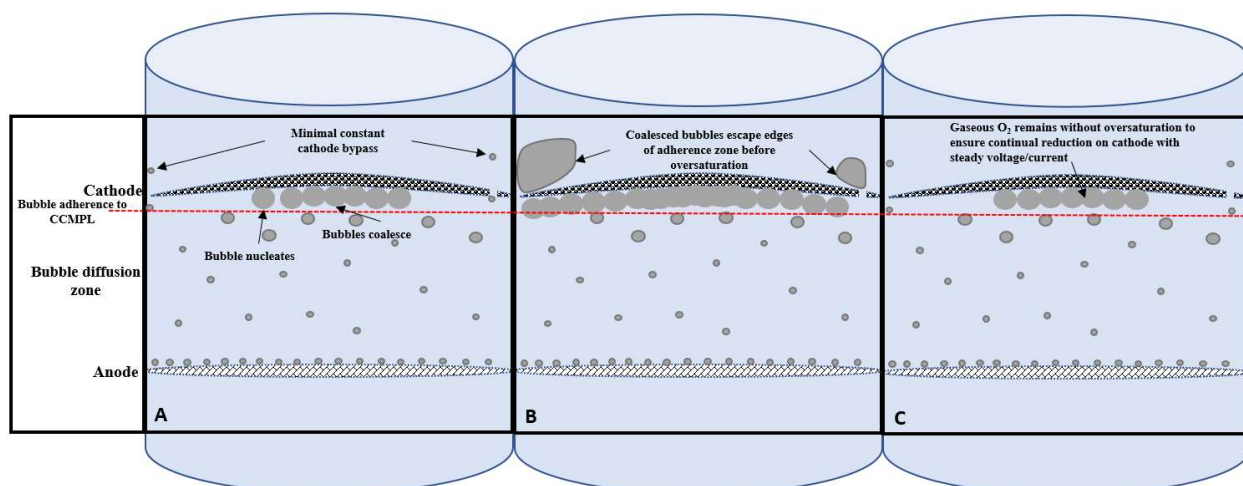

**Figure S3.** Convex CCMPL cathode with (A) O<sub>2</sub> reduction on PTFE surface, (B) engineered bubble bypass to prevent oversaturation, and (C) continual gas diffusion while ensuring steady voltage/current

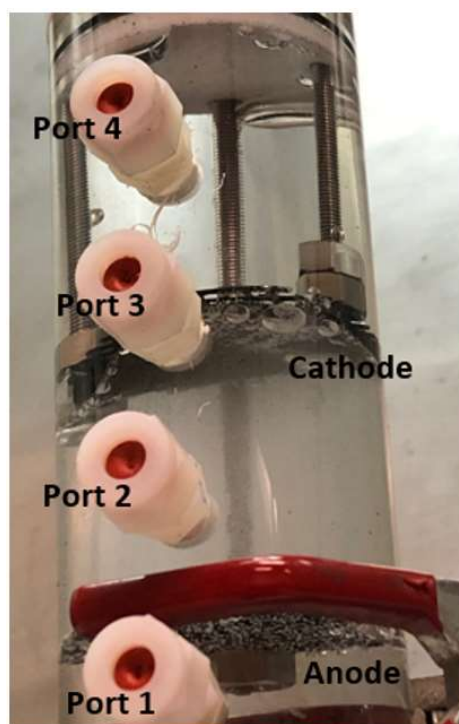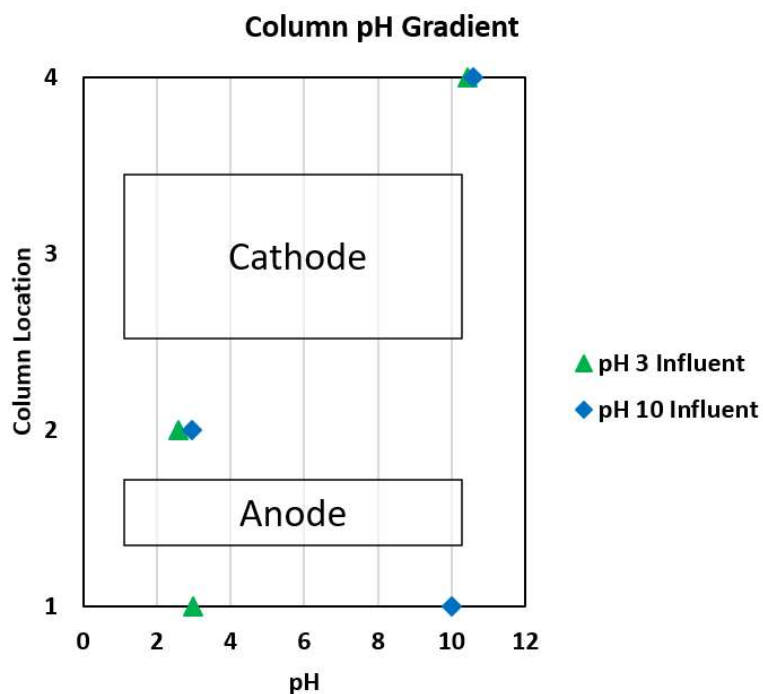

**Figure S4.** pH self-regulation within electrochemical system
